# Supplementary material
Source: PubMed Central journal article supplement (PMC4088353)
Supplement: Supp_Fig1.pdf [file Supp_Fig1.pdf]

## Supplementary Data

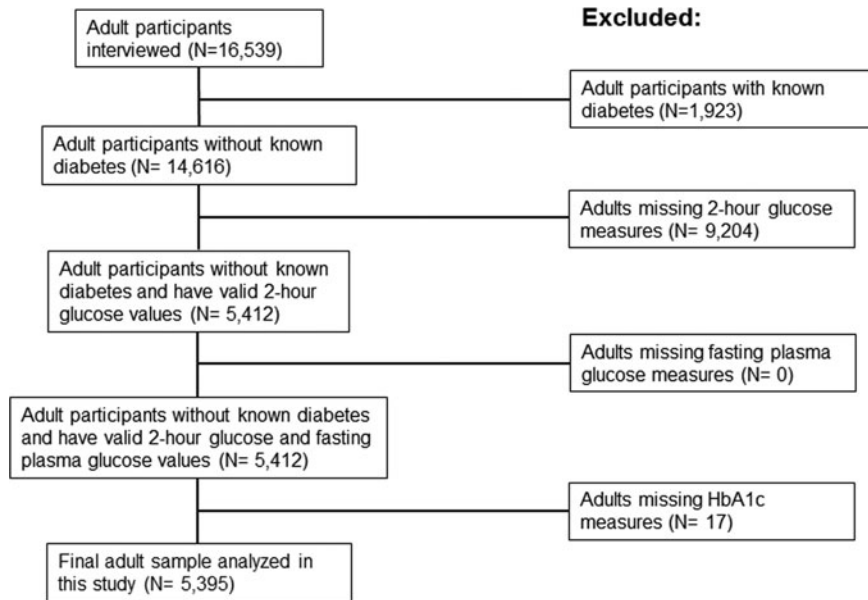

**SUPPLEMENTARY FIG. S1.** Flow chart of the numbers of participants included in the analyses.
