# Supplementary material
Source: PubMed Central journal article supplement (PMC4088353)
Supplement: Supp_Table1.pdf [file Supp_Table1.pdf]

SUPPLEMENTARY TABLE S1. CHARACTERISTICS OF PARTICIPANTS IN NHANES 2005–2010

|                  | <i>Prevalence (95% CI) or N (weighted %)</i> |                  |                  |                  |                  |                  |
|------------------|----------------------------------------------|------------------|------------------|------------------|------------------|------------------|
|                  | <i>All</i>                                   | <i>Men</i>       | <i>Women</i>     | <i>NHW</i>       | <i>NHB</i>       | <i>MEX</i>       |
| Sample size      | 5395 (100)                                   | 2684 (48.23)     | 2711 (51.77)     | 2726 (70.95)     | 942 (10.55)      | 999 (8.22)       |
| <High school     | 17.1 (15.5–18.8)                             | 18.4 (16.0–20.8) | 15.9 (14.5–17.4) | 11.6 (9.3–13.9)  | 22.7 (18.8–26.7) | 48.1 (44.0–52.2) |
| High school      | 24.2 (22.5–25.9)                             | 24.6 (22.2–27.0) | 23.8 (21.8–25.9) | 25.3 (23.1–27.5) | 25.4 (22.6–28.1) | 21.9 (18.5–25.3) |
| >High school     | 58.6 (55.8–61.5)                             | 57.0 (53.2–60.7) | 60.2 (57.5–62.9) | 63.1 (59.1–67.1) | 51.9 (48.5–55.3) | 29.9 (25.5–34.3) |
| Nonpoverty       | 71.5 (69.5–73.6)                             | 73.2 (70.9–75.5) | 70.1 (67.6–72.5) | 78.2 (75.3–81.2) | 56.2 (51.4–61.0) | 42.3 (38.1–46.4) |
| Obesity          | 32.1 (30.5–33.7)                             | 30.8 (28.2–33.4) | 33.3 (31.5–35.2) | 30.6 (28.5–32.7) | 45.6 (42.0–49.1) | 33.3 (29.6–37.0) |
| Hypertension     | 25.7 (23.8–27.7)                             | 25.9 (23.4–28.4) | 25.6 (23.6–27.5) | 27.4 (24.9–29.9) | 31.5 (28.1–34.8) | 12.5 (10.1–15.0) |
| Current smoker   | 22.5 (20.6–24.3)                             | 25.9 (23.4–28.5) | 19.2 (17.1–21.4) | 22.9 (20.5–25.4) | 24.2 (21.3–27.1) | 16.4 (13.5–19.3) |
| Low HDL          | 26.3 (24.7–27.9)                             | 24.9 (22.6–27.3) | 27.5 (25.6–29.5) | 25.8 (23.8–27.9) | 20.8 (17.1–24.6) | 32.7 (29.1–36.4) |
| High TC          | 14.6 (13.4–15.8)                             | 12.7 (11.1–14.3) | 16.4 (14.8–18.0) | 15.8 (14.2–17.3) | 11.1 (9.2–13.0)  | 12.5 (10.2–14.9) |
| High TG          | 26.8 (25.3–28.2)                             | 31.7 (29.3–34.0) | 22.2 (20.2–24.1) | 28.0 (26.1–29.9) | 13.5 (11.0–15.9) | 31.1 (27.1–35.2) |
| Hb ≤9.5 grams/dL | 0.7 (0.4–1.1)                                | 0.3 (0.0–0.6)    | 1.1 (0.7–1.6)    | 0.4 (0.1–0.7)    | 2.1 (1.0–3.2)    | 1.3 (0.4–2.2)    |

To convert total cholesterol and HDL mg/dL to mmol/L, multiply by 0.0259; for triglycerides, multiply by 0.0113.

NHANES, National Health and Nutrition Examination Survey; NHW, non-Hispanic white; NHB, non-Hispanic black; MEX, Mexican American; Nonpoverty, poverty index ratio >1.85; obesity, body mass index (BMI)  $\geq 30$  kg/m<sup>2</sup>; hypertension, diagnosed with hypertension, or mean systolic blood pressure  $\geq 140$  mmHg, or mean diastolic blood pressure  $\geq 90$  mmHg; low HDL, high-density lipoprotein cholesterol <40 mg/dL for men and <50 mg/dL for women; high TC, total cholesterol  $\geq 240$  mg/dL; high TG, fasting triglycerides  $\geq 150$  mg/day; Hb, hemoglobin.
