# Supplementary material
Source: PubMed Central journal article supplement (PMC4088353)
Supplement: Supp_Table2-5.pdf [file Supp_Table2-5.pdf]

SUPPLEMENTARY TABLE S2. SENSITIVITY AND SPECIFICITY, AND RECLASSIFICATION ACCORDING TO DIFFERENT HbA1c CUTOFFS FOR DIABETES DIAGNOSIS (FPG  $\geq$  126 mg/dL)

|             | <i>HbA1c</i> | <i>Test characteristics</i> |                    |                |            |            | <i>Reclassified (%)</i> |                     |
|-------------|--------------|-----------------------------|--------------------|----------------|------------|------------|-------------------------|---------------------|
|             |              | <i>Sensitivity</i>          | <i>Specificity</i> | <i>J value</i> | <i>PPV</i> | <i>NPV</i> | <i>Diabetes*</i>        | <i>No diabetes†</i> |
| All         | 6.2          | 0.601                       | 0.965              | 0.566          | 0.461      | 0.980      | 1.9                     | 3.3                 |
|             | 6.3          | 0.561                       | 0.980              | 0.541          | 0.577      | 0.978      | 2.1                     | 1.9                 |
|             | 6.4          | 0.486                       | 0.987              | 0.473          | 0.651      | 0.975      | 2.4                     | 1.2                 |
|             | 6.5          | 0.431                       | 0.992              | 0.423          | 0.732      | 0.973      | 2.7                     | 0.7                 |
|             | 6.6          | 0.375                       | 0.995              | 0.370          | 0.772      | 0.970      | 2.9                     | 0.5                 |
| Male        | 6.2          | 0.586                       | 0.965              | 0.551          | 0.516      | 0.973      | 1.2                     | 1.6                 |
|             | 6.3          | 0.543                       | 0.979              | 0.522          | 0.624      | 0.971      | 1.4                     | 1.0                 |
|             | 6.4          | 0.469                       | 0.986              | 0.455          | 0.679      | 0.967      | 1.6                     | 0.7                 |
|             | 6.5          | 0.432                       | 0.992              | 0.424          | 0.769      | 0.965      | 1.7                     | 0.4                 |
|             | 6.6          | 0.389                       | 0.994              | 0.383          | 0.808      | 0.962      | 1.8                     | 0.3                 |
| Female      | 6.2          | 0.626                       | 0.966              | 0.592          | 0.390      | 0.987      | 0.6                     | 1.6                 |
|             | 6.3          | 0.593                       | 0.981              | 0.574          | 0.514      | 0.986      | 0.7                     | 0.9                 |
|             | 6.4          | 0.516                       | 0.989              | 0.505          | 0.610      | 0.983      | 0.8                     | 0.6                 |
|             | 6.5          | 0.429                       | 0.993              | 0.421          | 0.672      | 0.980      | 1.0                     | 0.4                 |
|             | 6.6          | 0.352                       | 0.995              | 0.347          | 0.711      | 0.978      | 1.1                     | 0.2                 |
| NHW         | 6.2          | 0.542                       | 0.977              | 0.519          | 0.546      | 0.977      | 1.1                     | 1.1                 |
|             | 6.3          | 0.527                       | 0.988              | 0.515          | 0.690      | 0.976      | 1.1                     | 0.6                 |
|             | 6.4          | 0.443                       | 0.993              | 0.435          | 0.753      | 0.972      | 1.4                     | 0.4                 |
|             | 6.5          | 0.382                       | 0.995              | 0.377          | 0.794      | 0.970      | 1.5                     | 0.2                 |
|             | 6.6          | 0.290                       | 0.997              | 0.287          | 0.809      | 0.965      | 1.7                     | 0.2                 |
| NHB         | 6.2          | 0.650                       | 0.929              | 0.579          | 0.289      | 0.984      | 0.3                     | 1.2                 |
|             | 6.3          | 0.600                       | 0.956              | 0.556          | 0.375      | 0.982      | 0.3                     | 0.7                 |
|             | 6.4          | 0.525                       | 0.968              | 0.493          | 0.420      | 0.979      | 0.4                     | 0.5                 |
|             | 6.5          | 0.500                       | 0.978              | 0.478          | 0.500      | 0.978      | 0.4                     | 0.4                 |
|             | 6.6          | 0.450                       | 0.986              | 0.436          | 0.581      | 0.976      | 0.4                     | 0.2                 |
| MEX         | 6.2          | 0.698                       | 0.976              | 0.674          | 0.617      | 0.983      | 0.3                     | 0.4                 |
|             | 6.3          | 0.642                       | 0.985              | 0.627          | 0.708      | 0.980      | 0.4                     | 0.3                 |
|             | 6.4          | 0.547                       | 0.992              | 0.539          | 0.784      | 0.975      | 0.4                     | 0.1                 |
|             | 6.6          | 0.491                       | 0.996              | 0.486          | 0.867      | 0.972      | 0.5                     | 0.1                 |
|             | 20–39 years  | 6.2                         | 0.588              | 0.993          | 0.581      | 0.606      | 0.992                   | 0.3                 |
| 40–59 years | 6.3          | 0.529                       | 0.999              | 0.529          | 0.947      | 0.991      | 0.3                     | 0.0                 |
|             | 6.4          | 0.500                       | 0.999              | 0.499          | 0.944      | 0.991      | 0.3                     | 0.0                 |
|             | 6.5          | 0.471                       | 1.000              | 0.471          | 1.000      | 0.990      | 0.3                     | 0.0                 |
|             | 6.6          | 0.412                       | 1.000              | 0.412          | 1.000      | 0.989      | 0.4                     | 0.0                 |
|             | 6.2          | 0.680                       | 0.971              | 0.651          | 0.495      | 0.986      | 0.4                     | 1.0                 |
| 60–79 years | 6.3          | 0.627                       | 0.982              | 0.608          | 0.588      | 0.984      | 0.5                     | 0.6                 |
|             | 6.4          | 0.533                       | 0.989              | 0.522          | 0.667      | 0.981      | 0.6                     | 0.4                 |
|             | 6.5          | 0.467                       | 0.993              | 0.460          | 0.745      | 0.978      | 0.7                     | 0.2                 |
|             | 6.6          | 0.427                       | 0.996              | 0.423          | 0.821      | 0.977      | 0.8                     | 0.1                 |
|             | 6.2          | 0.563                       | 0.924              | 0.487          | 0.418      | 0.956      | 1.2                     | 2.1                 |
|             | 6.3          | 0.535                       | 0.953              | 0.488          | 0.524      | 0.955      | 1.2                     | 1.3                 |
|             | 6.4          | 0.458                       | 0.970              | 0.428          | 0.595      | 0.949      | 1.4                     | 0.8                 |
|             | 6.5          | 0.403                       | 0.981              | 0.384          | 0.674      | 0.945      | 1.6                     | 0.5                 |
|             | 6.6          | 0.340                       | 0.986              | 0.326          | 0.700      | 0.939      | 1.8                     | 0.4                 |

\*False negative, diabetic people reclassified as not having diabetes based on HbA1c cutoff.

†False positive, nondiabetic people reclassified as having diabetes based on HbA1c cutoff.

HbA1c, glycated hemoglobin; FPG, fasting plasma glucose; PPV, positive predict value; NPV, negative predict value; J value = Sensitivity + Specificity – 1; NHW, non-Hispanic white; NHB, non-Hispanic black; MEX, Mexican American.

SUPPLEMENTARY TABLE S3. SENSITIVITY AND SPECIFICITY, AND RECLASSIFICATION ACCORDING TO DIFFERENT HbA1c CUTOFFS FOR DIABETES (2-Hr GLUCOSE  $\geq$  200 mg/dL AND FPG  $<$  126 mg/dL)

|             | <i>HbA1c</i> | <i>Test characteristics</i> |                    |                |            |            | <i>Reclassified (%)</i> |                                |
|-------------|--------------|-----------------------------|--------------------|----------------|------------|------------|-------------------------|--------------------------------|
|             |              | <i>Sensitivity</i>          | <i>Specificity</i> | <i>J value</i> | <i>PPV</i> | <i>NPV</i> | <i>Diabetes*</i>        | <i>No diabetes<sup>†</sup></i> |
| All         | 6.2          | 0.186                       | 0.973              | 0.158          | 0.247      | 0.961      | 3.6                     | 2.5                            |
|             | 6.3          | 0.135                       | 0.985              | 0.120          | 0.308      | 0.959      | 3.8                     | 1.3                            |
|             | 6.4          | 0.080                       | 0.990              | 0.071          | 0.288      | 0.957      | 4.0                     | 0.9                            |
|             | 6.5          | 0.055                       | 0.995              | 0.049          | 0.325      | 0.956      | 4.2                     | 0.5                            |
|             | 6.6          | 0.038                       | 0.996              | 0.034          | 0.321      | 0.955      | 4.2                     | 0.4                            |
| Male        | 6.2          | 0.171                       | 0.971              | 0.142          | 0.202      | 0.964      | 1.6                     | 1.3                            |
|             | 6.3          | 0.133                       | 0.984              | 0.117          | 0.264      | 0.963      | 1.7                     | 0.7                            |
|             | 6.4          | 0.067                       | 0.988              | 0.055          | 0.194      | 0.961      | 1.8                     | 0.5                            |
|             | 6.5          | 0.048                       | 0.993              | 0.041          | 0.238      | 0.960      | 1.9                     | 0.3                            |
|             | 6.6          | 0.038                       | 0.995              | 0.034          | 0.267      | 0.960      | 1.9                     | 0.2                            |
| Female      | 6.2          | 0.197                       | 0.975              | 0.172          | 0.292      | 0.958      | 2.0                     | 1.2                            |
|             | 6.3          | 0.136                       | 0.987              | 0.123          | 0.353      | 0.956      | 2.1                     | 0.6                            |
|             | 6.4          | 0.091                       | 0.993              | 0.084          | 0.400      | 0.954      | 2.2                     | 0.3                            |
|             | 6.5          | 0.061                       | 0.996              | 0.056          | 0.421      | 0.952      | 2.3                     | 0.2                            |
|             | 6.6          | 0.038                       | 0.997              | 0.035          | 0.385      | 0.951      | 2.4                     | 0.1                            |
| NHW         | 6.2          | 0.135                       | 0.984              | 0.118          | 0.322      | 0.952      | 2.3                     | 0.7                            |
|             | 6.3          | 0.092                       | 0.993              | 0.085          | 0.419      | 0.950      | 2.4                     | 0.3                            |
|             | 6.4          | 0.050                       | 0.995              | 0.045          | 0.368      | 0.948      | 2.5                     | 0.2                            |
|             | 6.5          | 0.050                       | 0.998              | 0.047          | 0.538      | 0.948      | 2.5                     | 0.1                            |
|             | 6.6          | 0.035                       | 0.998              | 0.034          | 0.556      | 0.947      | 2.5                     | 0.1                            |
| NHB         | 6.2          | 0.526                       | 0.939              | 0.465          | 0.156      | 0.989      | 0.2                     | 1.0                            |
|             | 6.3          | 0.368                       | 0.963              | 0.331          | 0.175      | 0.986      | 0.2                     | 0.6                            |
|             | 6.4          | 0.263                       | 0.973              | 0.236          | 0.172      | 0.984      | 0.3                     | 0.4                            |
|             | 6.5          | 0.211                       | 0.982              | 0.192          | 0.200      | 0.983      | 0.3                     | 0.3                            |
|             | 6.6          | 0.105                       | 0.988              | 0.093          | 0.154      | 0.981      | 0.3                     | 0.2                            |
| MEX         | 6.2          | 0.087                       | 0.979              | 0.066          | 0.174      | 0.955      | 0.8                     | 0.4                            |
|             | 6.3          | 0.043                       | 0.987              | 0.030          | 0.143      | 0.953      | 0.8                     | 0.2                            |
|             | 6.4          | 0.043                       | 0.993              | 0.037          | 0.250      | 0.953      | 0.8                     | 0.1                            |
|             | 6.6          | 0.022                       | 0.997              | 0.018          | 0.250      | 0.952      | 0.8                     | 0.1                            |
|             | 6.2          | 0.118                       | 0.994              | 0.112          | 0.154      | 0.992      | 0.3                     | 0.2                            |
| 20–39 years | 6.4          | 0.000                       | 0.999              | –0.001         | 0.000      | 0.991      | 0.3                     | 0.0                            |
|             | 6.2          | 0.140                       | 0.975              | 0.115          | 0.154      | 0.972      | 0.9                     | 0.8                            |
| 40–59 years | 6.3          | 0.123                       | 0.985              | 0.108          | 0.212      | 0.972      | 0.9                     | 0.5                            |
|             | 6.4          | 0.088                       | 0.991              | 0.079          | 0.250      | 0.971      | 1.0                     | 0.3                            |
|             | 6.5          | 0.053                       | 0.995              | 0.047          | 0.250      | 0.970      | 1.0                     | 0.2                            |
|             | 6.6          | 0.035                       | 0.997              | 0.032          | 0.286      | 0.969      | 1.0                     | 0.1                            |
|             | 6.2          | 0.209                       | 0.941              | 0.149          | 0.301      | 0.907      | 2.4                     | 1.5                            |
| 60–79 years | 6.3          | 0.153                       | 0.966              | 0.120          | 0.357      | 0.903      | 2.6                     | 0.8                            |
|             | 6.4          | 0.086                       | 0.977              | 0.063          | 0.311      | 0.897      | 2.8                     | 0.6                            |
|             | 6.5          | 0.061                       | 0.986              | 0.048          | 0.357      | 0.896      | 2.8                     | 0.3                            |
|             | 6.6          | 0.043                       | 0.989              | 0.032          | 0.333      | 0.894      | 2.9                     | 0.3                            |

\*False negative, diabetic people reclassified as not having diabetes based on HbA1c cutoff.

<sup>†</sup>False positive, nondiabetic people reclassified as having diabetes based on HbA1c cutoff.

HbA1c, glycated hemoglobin; FPG, fasting plasma glucose; PPV, positive predict value; NPV, negative predict value; J value = Sensitivity + Specificity – 1; NHW, non-Hispanic white; NHB, non-Hispanic black; MEX, Mexican American.

SUPPLEMENTARY TABLE S4. SENSITIVITY AND SPECIFICITY, AND RECLASSIFICATION ACCORDING TO DIFFERENT HbA1c CUTOFFS FOR DIABETES (FPG  $\geq$  126 mg/dL AND/OR 2-HR GLUCOSE  $\geq$  200 mg/dL)

|             | <i>HbA1c</i> | <i>Test characteristics</i> |                    |                |            |            | <i>Reclassified (%)</i> |                     |
|-------------|--------------|-----------------------------|--------------------|----------------|------------|------------|-------------------------|---------------------|
|             |              | <i>Sensitivity</i>          | <i>Specificity</i> | <i>J value</i> | <i>PPV</i> | <i>NPV</i> | <i>Diabetes*</i>        | <i>No diabetes†</i> |
| All         | 6.2          | 0.400                       | 0.973              | 0.373          | 0.594      | 0.942      | 5.4                     | 2.5                 |
|             | 6.3          | 0.355                       | 0.985              | 0.340          | 0.707      | 0.939      | 5.9                     | 1.3                 |
|             | 6.4          | 0.290                       | 0.990              | 0.280          | 0.751      | 0.933      | 6.5                     | 0.9                 |
|             | 6.5          | 0.249                       | 0.995              | 0.243          | 0.819      | 0.930      | 6.8                     | 0.5                 |
|             | 6.6          | 0.212                       | 0.996              | 0.208          | 0.846      | 0.927      | 7.2                     | 0.4                 |
| Male        | 6.2          | 0.423                       | 0.971              | 0.394          | 0.614      | 0.938      | 2.9                     | 1.3                 |
|             | 6.3          | 0.382                       | 0.984              | 0.366          | 0.723      | 0.935      | 3.1                     | 0.7                 |
|             | 6.4          | 0.311                       | 0.988              | 0.299          | 0.741      | 0.928      | 3.4                     | 0.5                 |
|             | 6.5          | 0.281                       | 0.993              | 0.274          | 0.824      | 0.926      | 3.6                     | 0.3                 |
|             | 6.6          | 0.251                       | 0.995              | 0.246          | 0.859      | 0.923      | 3.7                     | 0.2                 |
| Female      | 6.2          | 0.372                       | 0.975              | 0.347          | 0.568      | 0.945      | 2.6                     | 1.2                 |
|             | 6.3          | 0.323                       | 0.987              | 0.310          | 0.686      | 0.942      | 2.8                     | 0.6                 |
|             | 6.4          | 0.265                       | 0.993              | 0.257          | 0.766      | 0.938      | 3.0                     | 0.3                 |
|             | 6.5          | 0.211                       | 0.996              | 0.206          | 0.810      | 0.934      | 3.3                     | 0.2                 |
|             | 6.6          | 0.166                       | 0.997              | 0.163          | 0.822      | 0.930      | 3.4                     | 0.1                 |
| NHW         | 6.2          | 0.331                       | 0.984              | 0.315          | 0.692      | 0.930      | 3.4                     | 0.7                 |
|             | 6.3          | 0.301                       | 0.993              | 0.294          | 0.820      | 0.928      | 3.5                     | 0.3                 |
|             | 6.4          | 0.239                       | 0.995              | 0.234          | 0.844      | 0.922      | 3.8                     | 0.2                 |
|             | 6.5          | 0.210                       | 0.998              | 0.207          | 0.905      | 0.919      | 4.0                     | 0.1                 |
|             | 6.6          | 0.158                       | 0.998              | 0.156          | 0.915      | 0.915      | 4.2                     | 0.1                 |
| NHB         | 6.2          | 0.610                       | 0.939              | 0.549          | 0.400      | 0.973      | 0.4                     | 1.0                 |
|             | 6.3          | 0.525                       | 0.963              | 0.488          | 0.484      | 0.968      | 0.5                     | 0.6                 |
|             | 6.4          | 0.441                       | 0.973              | 0.414          | 0.520      | 0.963      | 0.6                     | 0.4                 |
|             | 6.5          | 0.407                       | 0.982              | 0.389          | 0.600      | 0.961      | 0.6                     | 0.3                 |
|             | 6.6          | 0.339                       | 0.988              | 0.327          | 0.645      | 0.957      | 0.7                     | 0.2                 |
| MEX         | 6.2          | 0.414                       | 0.979              | 0.393          | 0.683      | 0.938      | 1.1                     | 0.4                 |
|             | 6.3          | 0.364                       | 0.987              | 0.350          | 0.750      | 0.934      | 1.2                     | 0.2                 |
|             | 6.4          | 0.313                       | 0.993              | 0.306          | 0.838      | 0.929      | 1.3                     | 0.1                 |
|             | 6.6          | 0.273                       | 0.997              | 0.269          | 0.900      | 0.926      | 1.3                     | 0.1                 |
|             | 20–39 years  | 6.2                         | 0.431              | 0.994          | 0.425      | 0.667      | 0.984                   | 0.5                 |
| 6.3         |              | 0.353                       | 0.999              | 0.352          | 0.947      | 0.982      | 0.6                     | 0.0                 |
| 6.4         |              | 0.333                       | 0.999              | 0.333          | 0.944      | 0.982      | 0.6                     | 0.0                 |
| 6.5         |              | 0.314                       | 1.000              | 0.314          | 1.000      | 0.981      | 0.6                     | 0.0                 |
| 6.6         |              | 0.275                       | 1.000              | 0.275          | 1.000      | 0.980      | 0.7                     | 0.0                 |
| 40–59 years | 6.2          | 0.447                       | 0.975              | 0.422          | 0.573      | 0.959      | 1.4                     | 0.8                 |
|             | 6.3          | 0.409                       | 0.985              | 0.394          | 0.675      | 0.957      | 1.4                     | 0.5                 |
|             | 6.4          | 0.341                       | 0.991              | 0.332          | 0.750      | 0.952      | 1.6                     | 0.3                 |
|             | 6.5          | 0.288                       | 0.995              | 0.283          | 0.809      | 0.949      | 1.7                     | 0.2                 |
|             | 6.6          | 0.258                       | 0.997              | 0.255          | 0.872      | 0.947      | 1.8                     | 0.1                 |
| 60–79 years | 6.2          | 0.375                       | 0.941              | 0.315          | 0.593      | 0.867      | 3.6                     | 1.5                 |
|             | 6.3          | 0.332                       | 0.966              | 0.298          | 0.694      | 0.863      | 3.8                     | 0.8                 |
|             | 6.4          | 0.261                       | 0.977              | 0.237          | 0.721      | 0.851      | 4.2                     | 0.6                 |
|             | 6.5          | 0.222                       | 0.986              | 0.208          | 0.791      | 0.846      | 4.4                     | 0.3                 |
|             | 6.6          | 0.182                       | 0.989              | 0.172          | 0.800      | 0.840      | 4.7                     | 0.3                 |

\*False negative, diabetic people reclassified as not having diabetes based on HbA1c cutoff.

†False positive, nondiabetic people reclassified as having diabetes based on HbA1c cutoff.

HbA1c, glycated hemoglobin; FPG, fasting plasma glucose; PPV, positive predict value; NPV, negative predict value; J value = Sensitivity + Specificity – 1; NHW, non-Hispanic white; NHB, non-Hispanic black; MEX, Mexican American.

SUPPLEMENTARY TABLE S5. SENSITIVITY AND SPECIFICITY, AND RECLASSIFICATION ACCORDING TO DIFFERENT HbA1c CUTOFFS FOR DIABETES (FPG  $\geq$  126 mg/dL AND 2-Hr GLUCOSE  $\geq$  200 mg/dL)

|             | HbA1c | Test characteristics |             |         |       |       | Reclassified (%) |                          |
|-------------|-------|----------------------|-------------|---------|-------|-------|------------------|--------------------------|
|             |       | Sensitivity          | Specificity | J value | PPV   | NPV   | Diabetes*        | No diabetes <sup>†</sup> |
| All         | 6.2   | 0.708                | 0.960       | 0.668   | 0.361 | 0.990 | 0.9              | 3.9                      |
|             | 6.3   | 0.685                | 0.975       | 0.659   | 0.467 | 0.990 | 1.0              | 2.4                      |
|             | 6.4   | 0.631                | 0.984       | 0.615   | 0.561 | 0.988 | 1.1              | 1.5                      |
|             | 6.5   | 0.589                | 0.990       | 0.580   | 0.664 | 0.987 | 1.3              | 0.9                      |
|             | 6.6   | 0.524                | 0.993       | 0.517   | 0.715 | 0.985 | 1.5              | 0.6                      |
| Male        | 6.2   | 0.706                | 0.957       | 0.663   | 0.391 | 0.988 | 0.6              | 2.1                      |
|             | 6.3   | 0.676                | 0.972       | 0.649   | 0.489 | 0.987 | 0.6              | 1.3                      |
|             | 6.4   | 0.647                | 0.982       | 0.629   | 0.589 | 0.986 | 0.7              | 0.9                      |
|             | 6.5   | 0.637                | 0.990       | 0.627   | 0.714 | 0.986 | 0.7              | 0.5                      |
|             | 6.6   | 0.588                | 0.993       | 0.581   | 0.769 | 0.984 | 0.8              | 0.3                      |
| Female      | 6.2   | 0.712                | 0.963       | 0.675   | 0.322 | 0.993 | 0.4              | 1.8                      |
|             | 6.3   | 0.697                | 0.978       | 0.675   | 0.438 | 0.992 | 0.4              | 1.1                      |
|             | 6.4   | 0.606                | 0.986       | 0.592   | 0.519 | 0.990 | 0.5              | 0.7                      |
|             | 6.5   | 0.515                | 0.991       | 0.506   | 0.586 | 0.988 | 0.6              | 0.4                      |
|             | 6.6   | 0.424                | 0.994       | 0.418   | 0.622 | 0.986 | 0.7              | 0.3                      |
| NHW         | 6.2   | 0.621                | 0.971       | 0.592   | 0.415 | 0.987 | 0.6              | 1.4                      |
|             | 6.3   | 0.621                | 0.983       | 0.603   | 0.540 | 0.987 | 0.6              | 0.9                      |
|             | 6.4   | 0.552                | 0.989       | 0.541   | 0.623 | 0.985 | 0.7              | 0.5                      |
|             | 6.5   | 0.506                | 0.993       | 0.499   | 0.698 | 0.984 | 0.8              | 0.4                      |
|             | 6.6   | 0.402                | 0.995       | 0.398   | 0.745 | 0.981 | 1.0              | 0.2                      |
| NHB         | 6.2   | 0.808                | 0.925       | 0.732   | 0.233 | 0.994 | 0.1              | 1.3                      |
|             | 6.3   | 0.808                | 0.953       | 0.761   | 0.328 | 0.994 | 0.1              | 0.8                      |
|             | 6.4   | 0.769                | 0.967       | 0.736   | 0.400 | 0.993 | 0.1              | 0.6                      |
|             | 6.5   | 0.731                | 0.977       | 0.708   | 0.475 | 0.992 | 0.1              | 0.4                      |
|             | 6.6   | 0.654                | 0.985       | 0.639   | 0.548 | 0.990 | 0.2              | 0.3                      |
| MEX         | 6.2   | 0.838                | 0.970       | 0.808   | 0.517 | 0.994 | 0.1              | 0.5                      |
|             | 6.3   | 0.784                | 0.980       | 0.764   | 0.604 | 0.992 | 0.1              | 0.4                      |
|             | 6.4   | 0.730                | 0.990       | 0.719   | 0.730 | 0.990 | 0.2              | 0.2                      |
|             | 6.6   | 0.676                | 0.995       | 0.670   | 0.833 | 0.988 | 0.2              | 0.1                      |
|             | 6.2   | 0.727                | 0.991       | 0.718   | 0.485 | 0.997 | 0.1              | 0.3                      |
| 20–39 years | 6.3   | 0.727                | 0.998       | 0.726   | 0.842 | 0.997 | 0.1              | 0.1                      |
|             | 6.4   | 0.682                | 0.998       | 0.680   | 0.833 | 0.996 | 0.1              | 0.1                      |
|             | 6.5   | 0.682                | 0.999       | 0.681   | 0.938 | 0.996 | 0.1              | 0.0                      |
|             | 6.6   | 0.636                | 1.000       | 0.636   | 1.000 | 0.996 | 0.1              | 0.0                      |
|             | 6.2   | 0.864                | 0.965       | 0.828   | 0.369 | 0.997 | 0.1              | 1.2                      |
| 40–59 years | 6.3   | 0.818                | 0.976       | 0.794   | 0.450 | 0.996 | 0.1              | 0.8                      |
|             | 6.4   | 0.727                | 0.985       | 0.712   | 0.533 | 0.993 | 0.2              | 0.5                      |
|             | 6.5   | 0.682                | 0.991       | 0.673   | 0.638 | 0.992 | 0.3              | 0.3                      |
|             | 6.6   | 0.659                | 0.995       | 0.654   | 0.744 | 0.992 | 0.3              | 0.2                      |
|             | 6.2   | 0.637                | 0.916       | 0.553   | 0.335 | 0.974 | 0.7              | 2.4                      |
| 60–79 years | 6.3   | 0.618                | 0.945       | 0.563   | 0.429 | 0.974 | 0.7              | 1.6                      |
|             | 6.4   | 0.578                | 0.966       | 0.545   | 0.532 | 0.972 | 0.8              | 1.0                      |
|             | 6.5   | 0.529                | 0.979       | 0.509   | 0.628 | 0.969 | 0.9              | 0.6                      |
|             | 6.6   | 0.441                | 0.984       | 0.425   | 0.643 | 0.964 | 1.1              | 0.5                      |

\*False negative, diabetic people reclassified as not having diabetes based on HbA1c cutoff.

<sup>†</sup>False positive, nondiabetic people reclassified as having diabetes based on HbA1c cutoff.

HbA1c, glycated hemoglobin; FPG, fasting plasma glucose; PPV, positive predict value; NPV, negative predict value; J value = Sensitivity + Specificity – 1; NHW, non-Hispanic white; NHB, non-Hispanic black; MEX, Mexican American.
