# Supplementary material
Source: PubMed Central journal article supplement (PMC4088353)
Supplement: Supp_Table2.pdf [file Supp_Table2.pdf]

SUPPLEMENTARY TABLE S2. SENSITIVITY AND SPECIFICITY, AND RECLASSIFICATION ACCORDING TO DIFFERENT HbA1c CUTOFFS FOR DIABETES DIAGNOSIS (FPG  $\geq$  126 mg/dL)

|             | <i>HbA1c</i> | <i>Test characteristics</i> |                    |                |            |            | <i>Reclassified (%)</i> |                     |
|-------------|--------------|-----------------------------|--------------------|----------------|------------|------------|-------------------------|---------------------|
|             |              | <i>Sensitivity</i>          | <i>Specificity</i> | <i>J value</i> | <i>PPV</i> | <i>NPV</i> | <i>Diabetes*</i>        | <i>No diabetes†</i> |
| All         | 6.2          | 0.601                       | 0.965              | 0.566          | 0.461      | 0.980      | 1.9                     | 3.3                 |
|             | 6.3          | 0.561                       | 0.980              | 0.541          | 0.577      | 0.978      | 2.1                     | 1.9                 |
|             | 6.4          | 0.486                       | 0.987              | 0.473          | 0.651      | 0.975      | 2.4                     | 1.2                 |
|             | 6.5          | 0.431                       | 0.992              | 0.423          | 0.732      | 0.973      | 2.7                     | 0.7                 |
|             | 6.6          | 0.375                       | 0.995              | 0.370          | 0.772      | 0.970      | 2.9                     | 0.5                 |
| Male        | 6.2          | 0.586                       | 0.965              | 0.551          | 0.516      | 0.973      | 1.2                     | 1.6                 |
|             | 6.3          | 0.543                       | 0.979              | 0.522          | 0.624      | 0.971      | 1.4                     | 1.0                 |
|             | 6.4          | 0.469                       | 0.986              | 0.455          | 0.679      | 0.967      | 1.6                     | 0.7                 |
|             | 6.5          | 0.432                       | 0.992              | 0.424          | 0.769      | 0.965      | 1.7                     | 0.4                 |
|             | 6.6          | 0.389                       | 0.994              | 0.383          | 0.808      | 0.962      | 1.8                     | 0.3                 |
| Female      | 6.2          | 0.626                       | 0.966              | 0.592          | 0.390      | 0.987      | 0.6                     | 1.6                 |
|             | 6.3          | 0.593                       | 0.981              | 0.574          | 0.514      | 0.986      | 0.7                     | 0.9                 |
|             | 6.4          | 0.516                       | 0.989              | 0.505          | 0.610      | 0.983      | 0.8                     | 0.6                 |
|             | 6.5          | 0.429                       | 0.993              | 0.421          | 0.672      | 0.980      | 1.0                     | 0.4                 |
|             | 6.6          | 0.352                       | 0.995              | 0.347          | 0.711      | 0.978      | 1.1                     | 0.2                 |
| NHW         | 6.2          | 0.542                       | 0.977              | 0.519          | 0.546      | 0.977      | 1.1                     | 1.1                 |
|             | 6.3          | 0.527                       | 0.988              | 0.515          | 0.690      | 0.976      | 1.1                     | 0.6                 |
|             | 6.4          | 0.443                       | 0.993              | 0.435          | 0.753      | 0.972      | 1.4                     | 0.4                 |
|             | 6.5          | 0.382                       | 0.995              | 0.377          | 0.794      | 0.970      | 1.5                     | 0.2                 |
|             | 6.6          | 0.290                       | 0.997              | 0.287          | 0.809      | 0.965      | 1.7                     | 0.2                 |
| NHB         | 6.2          | 0.650                       | 0.929              | 0.579          | 0.289      | 0.984      | 0.3                     | 1.2                 |
|             | 6.3          | 0.600                       | 0.956              | 0.556          | 0.375      | 0.982      | 0.3                     | 0.7                 |
|             | 6.4          | 0.525                       | 0.968              | 0.493          | 0.420      | 0.979      | 0.4                     | 0.5                 |
|             | 6.5          | 0.500                       | 0.978              | 0.478          | 0.500      | 0.978      | 0.4                     | 0.4                 |
|             | 6.6          | 0.450                       | 0.986              | 0.436          | 0.581      | 0.976      | 0.4                     | 0.2                 |
| MEX         | 6.2          | 0.698                       | 0.976              | 0.674          | 0.617      | 0.983      | 0.3                     | 0.4                 |
|             | 6.3          | 0.642                       | 0.985              | 0.627          | 0.708      | 0.980      | 0.4                     | 0.3                 |
|             | 6.4          | 0.547                       | 0.992              | 0.539          | 0.784      | 0.975      | 0.4                     | 0.1                 |
|             | 6.6          | 0.491                       | 0.996              | 0.486          | 0.867      | 0.972      | 0.5                     | 0.1                 |
|             | 20–39 years  | 6.2                         | 0.588              | 0.993          | 0.581      | 0.606      | 0.992                   | 0.3                 |
| 40–59 years | 6.3          | 0.529                       | 0.999              | 0.529          | 0.947      | 0.991      | 0.3                     | 0.0                 |
|             | 6.4          | 0.500                       | 0.999              | 0.499          | 0.944      | 0.991      | 0.3                     | 0.0                 |
|             | 6.5          | 0.471                       | 1.000              | 0.471          | 1.000      | 0.990      | 0.3                     | 0.0                 |
|             | 6.6          | 0.412                       | 1.000              | 0.412          | 1.000      | 0.989      | 0.4                     | 0.0                 |
|             | 6.2          | 0.680                       | 0.971              | 0.651          | 0.495      | 0.986      | 0.4                     | 1.0                 |
| 60–79 years | 6.3          | 0.627                       | 0.982              | 0.608          | 0.588      | 0.984      | 0.5                     | 0.6                 |
|             | 6.4          | 0.533                       | 0.989              | 0.522          | 0.667      | 0.981      | 0.6                     | 0.4                 |
|             | 6.5          | 0.467                       | 0.993              | 0.460          | 0.745      | 0.978      | 0.7                     | 0.2                 |
|             | 6.6          | 0.427                       | 0.996              | 0.423          | 0.821      | 0.977      | 0.8                     | 0.1                 |
|             | 6.2          | 0.563                       | 0.924              | 0.487          | 0.418      | 0.956      | 1.2                     | 2.1                 |
|             | 6.3          | 0.535                       | 0.953              | 0.488          | 0.524      | 0.955      | 1.2                     | 1.3                 |
|             | 6.4          | 0.458                       | 0.970              | 0.428          | 0.595      | 0.949      | 1.4                     | 0.8                 |
|             | 6.5          | 0.403                       | 0.981              | 0.384          | 0.674      | 0.945      | 1.6                     | 0.5                 |
|             | 6.6          | 0.340                       | 0.986              | 0.326          | 0.700      | 0.939      | 1.8                     | 0.4                 |

\*False negative, diabetic people reclassified as not having diabetes based on HbA1c cutoff.

†False positive, nondiabetic people reclassified as having diabetes based on HbA1c cutoff.

HbA1c, glycated hemoglobin; FPG, fasting plasma glucose; PPV, positive predict value; NPV, negative predict value; J value = Sensitivity + Specificity – 1; NHW, non-Hispanic white; NHB, non-Hispanic black; MEX, Mexican American.
