# Supplementary material
Source: PubMed Central journal article supplement (PMC4088353)
Supplement: Supp_Table3.pdf [file Supp_Table3.pdf]

SUPPLEMENTARY TABLE S3. SENSITIVITY AND SPECIFICITY, AND RECLASSIFICATION ACCORDING TO DIFFERENT HbA1c CUTOFFS FOR DIABETES (2-Hr GLUCOSE  $\geq$  200 MG/DL AND FPG  $<$  126 MG/DL)

|             | <i>HbA1c</i> | <i>Test characteristics</i> |                    |                |            |            | <i>Reclassified (%)</i> |                                |
|-------------|--------------|-----------------------------|--------------------|----------------|------------|------------|-------------------------|--------------------------------|
|             |              | <i>Sensitivity</i>          | <i>Specificity</i> | <i>J value</i> | <i>PPV</i> | <i>NPV</i> | <i>Diabetes*</i>        | <i>No diabetes<sup>†</sup></i> |
| All         | 6.2          | 0.186                       | 0.973              | 0.158          | 0.247      | 0.961      | 3.6                     | 2.5                            |
|             | 6.3          | 0.135                       | 0.985              | 0.120          | 0.308      | 0.959      | 3.8                     | 1.3                            |
|             | 6.4          | 0.080                       | 0.990              | 0.071          | 0.288      | 0.957      | 4.0                     | 0.9                            |
|             | 6.5          | 0.055                       | 0.995              | 0.049          | 0.325      | 0.956      | 4.2                     | 0.5                            |
|             | 6.6          | 0.038                       | 0.996              | 0.034          | 0.321      | 0.955      | 4.2                     | 0.4                            |
| Male        | 6.2          | 0.171                       | 0.971              | 0.142          | 0.202      | 0.964      | 1.6                     | 1.3                            |
|             | 6.3          | 0.133                       | 0.984              | 0.117          | 0.264      | 0.963      | 1.7                     | 0.7                            |
|             | 6.4          | 0.067                       | 0.988              | 0.055          | 0.194      | 0.961      | 1.8                     | 0.5                            |
|             | 6.5          | 0.048                       | 0.993              | 0.041          | 0.238      | 0.960      | 1.9                     | 0.3                            |
|             | 6.6          | 0.038                       | 0.995              | 0.034          | 0.267      | 0.960      | 1.9                     | 0.2                            |
| Female      | 6.2          | 0.197                       | 0.975              | 0.172          | 0.292      | 0.958      | 2.0                     | 1.2                            |
|             | 6.3          | 0.136                       | 0.987              | 0.123          | 0.353      | 0.956      | 2.1                     | 0.6                            |
|             | 6.4          | 0.091                       | 0.993              | 0.084          | 0.400      | 0.954      | 2.2                     | 0.3                            |
|             | 6.5          | 0.061                       | 0.996              | 0.056          | 0.421      | 0.952      | 2.3                     | 0.2                            |
|             | 6.6          | 0.038                       | 0.997              | 0.035          | 0.385      | 0.951      | 2.4                     | 0.1                            |
| NHW         | 6.2          | 0.135                       | 0.984              | 0.118          | 0.322      | 0.952      | 2.3                     | 0.7                            |
|             | 6.3          | 0.092                       | 0.993              | 0.085          | 0.419      | 0.950      | 2.4                     | 0.3                            |
|             | 6.4          | 0.050                       | 0.995              | 0.045          | 0.368      | 0.948      | 2.5                     | 0.2                            |
|             | 6.5          | 0.050                       | 0.998              | 0.047          | 0.538      | 0.948      | 2.5                     | 0.1                            |
|             | 6.6          | 0.035                       | 0.998              | 0.034          | 0.556      | 0.947      | 2.5                     | 0.1                            |
| NHB         | 6.2          | 0.526                       | 0.939              | 0.465          | 0.156      | 0.989      | 0.2                     | 1.0                            |
|             | 6.3          | 0.368                       | 0.963              | 0.331          | 0.175      | 0.986      | 0.2                     | 0.6                            |
|             | 6.4          | 0.263                       | 0.973              | 0.236          | 0.172      | 0.984      | 0.3                     | 0.4                            |
|             | 6.5          | 0.211                       | 0.982              | 0.192          | 0.200      | 0.983      | 0.3                     | 0.3                            |
|             | 6.6          | 0.105                       | 0.988              | 0.093          | 0.154      | 0.981      | 0.3                     | 0.2                            |
| MEX         | 6.2          | 0.087                       | 0.979              | 0.066          | 0.174      | 0.955      | 0.8                     | 0.4                            |
|             | 6.3          | 0.043                       | 0.987              | 0.030          | 0.143      | 0.953      | 0.8                     | 0.2                            |
|             | 6.4          | 0.043                       | 0.993              | 0.037          | 0.250      | 0.953      | 0.8                     | 0.1                            |
|             | 6.6          | 0.022                       | 0.997              | 0.018          | 0.250      | 0.952      | 0.8                     | 0.1                            |
|             | 6.2          | 0.118                       | 0.994              | 0.112          | 0.154      | 0.992      | 0.3                     | 0.2                            |
| 20–39 years | 6.4          | 0.000                       | 0.999              | –0.001         | 0.000      | 0.991      | 0.3                     | 0.0                            |
| 40–59 years | 6.2          | 0.140                       | 0.975              | 0.115          | 0.154      | 0.972      | 0.9                     | 0.8                            |
|             | 6.3          | 0.123                       | 0.985              | 0.108          | 0.212      | 0.972      | 0.9                     | 0.5                            |
|             | 6.4          | 0.088                       | 0.991              | 0.079          | 0.250      | 0.971      | 1.0                     | 0.3                            |
|             | 6.5          | 0.053                       | 0.995              | 0.047          | 0.250      | 0.970      | 1.0                     | 0.2                            |
|             | 6.6          | 0.035                       | 0.997              | 0.032          | 0.286      | 0.969      | 1.0                     | 0.1                            |
| 60–79 years | 6.2          | 0.209                       | 0.941              | 0.149          | 0.301      | 0.907      | 2.4                     | 1.5                            |
|             | 6.3          | 0.153                       | 0.966              | 0.120          | 0.357      | 0.903      | 2.6                     | 0.8                            |
|             | 6.4          | 0.086                       | 0.977              | 0.063          | 0.311      | 0.897      | 2.8                     | 0.6                            |
|             | 6.5          | 0.061                       | 0.986              | 0.048          | 0.357      | 0.896      | 2.8                     | 0.3                            |
|             | 6.6          | 0.043                       | 0.989              | 0.032          | 0.333      | 0.894      | 2.9                     | 0.3                            |

\*False negative, diabetic people reclassified as not having diabetes based on HbA1c cutoff.

<sup>†</sup>False positive, nondiabetic people reclassified as having diabetes based on HbA1c cutoff.

HbA1c, glycated hemoglobin; FPG, fasting plasma glucose; PPV, positive predict value; NPV, negative predict value; J value = Sensitivity + Specificity – 1; NHW, non-Hispanic white; NHB, non-Hispanic black; MEX, Mexican American.
