# Supplementary material
Source: PubMed Central journal article supplement (PMC4088353)
Supplement: Supp_Table4.pdf [file Supp_Table4.pdf]

SUPPLEMENTARY TABLE S4. SENSITIVITY AND SPECIFICITY, AND RECLASSIFICATION ACCORDING TO DIFFERENT HbA1c CUTOFFS FOR DIABETES (FPG  $\geq$  126 mg/dL AND/OR 2-HR GLUCOSE  $\geq$  200 mg/dL)

|             | <i>HbA1c</i> | <i>Test characteristics</i> |                    |                |            |            | <i>Reclassified (%)</i> |                     |
|-------------|--------------|-----------------------------|--------------------|----------------|------------|------------|-------------------------|---------------------|
|             |              | <i>Sensitivity</i>          | <i>Specificity</i> | <i>J value</i> | <i>PPV</i> | <i>NPV</i> | <i>Diabetes*</i>        | <i>No diabetes†</i> |
| All         | 6.2          | 0.400                       | 0.973              | 0.373          | 0.594      | 0.942      | 5.4                     | 2.5                 |
|             | 6.3          | 0.355                       | 0.985              | 0.340          | 0.707      | 0.939      | 5.9                     | 1.3                 |
|             | 6.4          | 0.290                       | 0.990              | 0.280          | 0.751      | 0.933      | 6.5                     | 0.9                 |
|             | 6.5          | 0.249                       | 0.995              | 0.243          | 0.819      | 0.930      | 6.8                     | 0.5                 |
|             | 6.6          | 0.212                       | 0.996              | 0.208          | 0.846      | 0.927      | 7.2                     | 0.4                 |
| Male        | 6.2          | 0.423                       | 0.971              | 0.394          | 0.614      | 0.938      | 2.9                     | 1.3                 |
|             | 6.3          | 0.382                       | 0.984              | 0.366          | 0.723      | 0.935      | 3.1                     | 0.7                 |
|             | 6.4          | 0.311                       | 0.988              | 0.299          | 0.741      | 0.928      | 3.4                     | 0.5                 |
|             | 6.5          | 0.281                       | 0.993              | 0.274          | 0.824      | 0.926      | 3.6                     | 0.3                 |
|             | 6.6          | 0.251                       | 0.995              | 0.246          | 0.859      | 0.923      | 3.7                     | 0.2                 |
| Female      | 6.2          | 0.372                       | 0.975              | 0.347          | 0.568      | 0.945      | 2.6                     | 1.2                 |
|             | 6.3          | 0.323                       | 0.987              | 0.310          | 0.686      | 0.942      | 2.8                     | 0.6                 |
|             | 6.4          | 0.265                       | 0.993              | 0.257          | 0.766      | 0.938      | 3.0                     | 0.3                 |
|             | 6.5          | 0.211                       | 0.996              | 0.206          | 0.810      | 0.934      | 3.3                     | 0.2                 |
|             | 6.6          | 0.166                       | 0.997              | 0.163          | 0.822      | 0.930      | 3.4                     | 0.1                 |
| NHW         | 6.2          | 0.331                       | 0.984              | 0.315          | 0.692      | 0.930      | 3.4                     | 0.7                 |
|             | 6.3          | 0.301                       | 0.993              | 0.294          | 0.820      | 0.928      | 3.5                     | 0.3                 |
|             | 6.4          | 0.239                       | 0.995              | 0.234          | 0.844      | 0.922      | 3.8                     | 0.2                 |
|             | 6.5          | 0.210                       | 0.998              | 0.207          | 0.905      | 0.919      | 4.0                     | 0.1                 |
|             | 6.6          | 0.158                       | 0.998              | 0.156          | 0.915      | 0.915      | 4.2                     | 0.1                 |
| NHB         | 6.2          | 0.610                       | 0.939              | 0.549          | 0.400      | 0.973      | 0.4                     | 1.0                 |
|             | 6.3          | 0.525                       | 0.963              | 0.488          | 0.484      | 0.968      | 0.5                     | 0.6                 |
|             | 6.4          | 0.441                       | 0.973              | 0.414          | 0.520      | 0.963      | 0.6                     | 0.4                 |
|             | 6.5          | 0.407                       | 0.982              | 0.389          | 0.600      | 0.961      | 0.6                     | 0.3                 |
|             | 6.6          | 0.339                       | 0.988              | 0.327          | 0.645      | 0.957      | 0.7                     | 0.2                 |
| MEX         | 6.2          | 0.414                       | 0.979              | 0.393          | 0.683      | 0.938      | 1.1                     | 0.4                 |
|             | 6.3          | 0.364                       | 0.987              | 0.350          | 0.750      | 0.934      | 1.2                     | 0.2                 |
|             | 6.4          | 0.313                       | 0.993              | 0.306          | 0.838      | 0.929      | 1.3                     | 0.1                 |
|             | 6.6          | 0.273                       | 0.997              | 0.269          | 0.900      | 0.926      | 1.3                     | 0.1                 |
|             | 20–39 years  | 6.2                         | 0.431              | 0.994          | 0.425      | 0.667      | 0.984                   | 0.5                 |
| 6.3         |              | 0.353                       | 0.999              | 0.352          | 0.947      | 0.982      | 0.6                     | 0.0                 |
| 6.4         |              | 0.333                       | 0.999              | 0.333          | 0.944      | 0.982      | 0.6                     | 0.0                 |
| 6.5         |              | 0.314                       | 1.000              | 0.314          | 1.000      | 0.981      | 0.6                     | 0.0                 |
| 6.6         |              | 0.275                       | 1.000              | 0.275          | 1.000      | 0.980      | 0.7                     | 0.0                 |
| 40–59 years | 6.2          | 0.447                       | 0.975              | 0.422          | 0.573      | 0.959      | 1.4                     | 0.8                 |
|             | 6.3          | 0.409                       | 0.985              | 0.394          | 0.675      | 0.957      | 1.4                     | 0.5                 |
|             | 6.4          | 0.341                       | 0.991              | 0.332          | 0.750      | 0.952      | 1.6                     | 0.3                 |
|             | 6.5          | 0.288                       | 0.995              | 0.283          | 0.809      | 0.949      | 1.7                     | 0.2                 |
|             | 6.6          | 0.258                       | 0.997              | 0.255          | 0.872      | 0.947      | 1.8                     | 0.1                 |
| 60–79 years | 6.2          | 0.375                       | 0.941              | 0.315          | 0.593      | 0.867      | 3.6                     | 1.5                 |
|             | 6.3          | 0.332                       | 0.966              | 0.298          | 0.694      | 0.863      | 3.8                     | 0.8                 |
|             | 6.4          | 0.261                       | 0.977              | 0.237          | 0.721      | 0.851      | 4.2                     | 0.6                 |
|             | 6.5          | 0.222                       | 0.986              | 0.208          | 0.791      | 0.846      | 4.4                     | 0.3                 |
|             | 6.6          | 0.182                       | 0.989              | 0.172          | 0.800      | 0.840      | 4.7                     | 0.3                 |

\*False negative, diabetic people reclassified as not having diabetes based on HbA1c cutoff.

†False positive, nondiabetic people reclassified as having diabetes based on HbA1c cutoff.

HbA1c, glycated hemoglobin; FPG, fasting plasma glucose; PPV, positive predict value; NPV, negative predict value; J value = Sensitivity + Specificity – 1; NHW, non-Hispanic white; NHB, non-Hispanic black; MEX, Mexican American.
