# Supplementary material
Source: PubMed Central journal article supplement (PMC4088353)
Supplement: Supp_Table5.pdf [file Supp_Table5.pdf]

SUPPLEMENTARY TABLE S5. SENSITIVITY AND SPECIFICITY, AND RECLASSIFICATION ACCORDING TO DIFFERENT HbA1c CUTOFFS FOR DIABETES (FPG ≥ 126 mg/dL AND 2-Hr GLUCOSE ≥ 200 mg/dL)

|             | HbA1c | Test characteristics |             |         |       |       | Reclassified (%) |              |
|-------------|-------|----------------------|-------------|---------|-------|-------|------------------|--------------|
|             |       | Sensitivity          | Specificity | J value | PPV   | NPV   | Diabetes*        | No diabetes† |
| All         | 6.2   | 0.708                | 0.960       | 0.668   | 0.361 | 0.990 | 0.9              | 3.9          |
|             | 6.3   | 0.685                | 0.975       | 0.659   | 0.467 | 0.990 | 1.0              | 2.4          |
|             | 6.4   | 0.631                | 0.984       | 0.615   | 0.561 | 0.988 | 1.1              | 1.5          |
|             | 6.5   | 0.589                | 0.990       | 0.580   | 0.664 | 0.987 | 1.3              | 0.9          |
|             | 6.6   | 0.524                | 0.993       | 0.517   | 0.715 | 0.985 | 1.5              | 0.6          |
| Male        | 6.2   | 0.706                | 0.957       | 0.663   | 0.391 | 0.988 | 0.6              | 2.1          |
|             | 6.3   | 0.676                | 0.972       | 0.649   | 0.489 | 0.987 | 0.6              | 1.3          |
|             | 6.4   | 0.647                | 0.982       | 0.629   | 0.589 | 0.986 | 0.7              | 0.9          |
|             | 6.5   | 0.637                | 0.990       | 0.627   | 0.714 | 0.986 | 0.7              | 0.5          |
|             | 6.6   | 0.588                | 0.993       | 0.581   | 0.769 | 0.984 | 0.8              | 0.3          |
| Female      | 6.2   | 0.712                | 0.963       | 0.675   | 0.322 | 0.993 | 0.4              | 1.8          |
|             | 6.3   | 0.697                | 0.978       | 0.675   | 0.438 | 0.992 | 0.4              | 1.1          |
|             | 6.4   | 0.606                | 0.986       | 0.592   | 0.519 | 0.990 | 0.5              | 0.7          |
|             | 6.5   | 0.515                | 0.991       | 0.506   | 0.586 | 0.988 | 0.6              | 0.4          |
|             | 6.6   | 0.424                | 0.994       | 0.418   | 0.622 | 0.986 | 0.7              | 0.3          |
| NHW         | 6.2   | 0.621                | 0.971       | 0.592   | 0.415 | 0.987 | 0.6              | 1.4          |
|             | 6.3   | 0.621                | 0.983       | 0.603   | 0.540 | 0.987 | 0.6              | 0.9          |
|             | 6.4   | 0.552                | 0.989       | 0.541   | 0.623 | 0.985 | 0.7              | 0.5          |
|             | 6.5   | 0.506                | 0.993       | 0.499   | 0.698 | 0.984 | 0.8              | 0.4          |
|             | 6.6   | 0.402                | 0.995       | 0.398   | 0.745 | 0.981 | 1.0              | 0.2          |
| NHB         | 6.2   | 0.808                | 0.925       | 0.732   | 0.233 | 0.994 | 0.1              | 1.3          |
|             | 6.3   | 0.808                | 0.953       | 0.761   | 0.328 | 0.994 | 0.1              | 0.8          |
|             | 6.4   | 0.769                | 0.967       | 0.736   | 0.400 | 0.993 | 0.1              | 0.6          |
|             | 6.5   | 0.731                | 0.977       | 0.708   | 0.475 | 0.992 | 0.1              | 0.4          |
|             | 6.6   | 0.654                | 0.985       | 0.639   | 0.548 | 0.990 | 0.2              | 0.3          |
| MEX         | 6.2   | 0.838                | 0.970       | 0.808   | 0.517 | 0.994 | 0.1              | 0.5          |
|             | 6.3   | 0.784                | 0.980       | 0.764   | 0.604 | 0.992 | 0.1              | 0.4          |
|             | 6.4   | 0.730                | 0.990       | 0.719   | 0.730 | 0.990 | 0.2              | 0.2          |
|             | 6.6   | 0.676                | 0.995       | 0.670   | 0.833 | 0.988 | 0.2              | 0.1          |
|             | 6.2   | 0.727                | 0.991       | 0.718   | 0.485 | 0.997 | 0.1              | 0.3          |
| 20–39 years | 6.3   | 0.727                | 0.998       | 0.726   | 0.842 | 0.997 | 0.1              | 0.1          |
|             | 6.4   | 0.682                | 0.998       | 0.680   | 0.833 | 0.996 | 0.1              | 0.1          |
|             | 6.5   | 0.682                | 0.999       | 0.681   | 0.938 | 0.996 | 0.1              | 0.0          |
|             | 6.6   | 0.636                | 1.000       | 0.636   | 1.000 | 0.996 | 0.1              | 0.0          |
|             | 6.2   | 0.864                | 0.965       | 0.828   | 0.369 | 0.997 | 0.1              | 1.2          |
| 40–59 years | 6.3   | 0.818                | 0.976       | 0.794   | 0.450 | 0.996 | 0.1              | 0.8          |
|             | 6.4   | 0.727                | 0.985       | 0.712   | 0.533 | 0.993 | 0.2              | 0.5          |
|             | 6.5   | 0.682                | 0.991       | 0.673   | 0.638 | 0.992 | 0.3              | 0.3          |
|             | 6.6   | 0.659                | 0.995       | 0.654   | 0.744 | 0.992 | 0.3              | 0.2          |
|             | 6.2   | 0.637                | 0.916       | 0.553   | 0.335 | 0.974 | 0.7              | 2.4          |
| 60–79 years | 6.3   | 0.618                | 0.945       | 0.563   | 0.429 | 0.974 | 0.7              | 1.6          |
|             | 6.4   | 0.578                | 0.966       | 0.545   | 0.532 | 0.972 | 0.8              | 1.0          |
|             | 6.5   | 0.529                | 0.979       | 0.509   | 0.628 | 0.969 | 0.9              | 0.6          |
|             | 6.6   | 0.441                | 0.984       | 0.425   | 0.643 | 0.964 | 1.1              | 0.5          |

\*False negative, diabetic people reclassified as not having diabetes based on HbA1c cutoff.

†False positive, nondiabetic people reclassified as having diabetes based on HbA1c cutoff.

HbA1c, glycated hemoglobin; FPG, fasting plasma glucose; PPV, positive predict value; NPV, negative predict value; J value = Sensitivity + Specificity – 1; NHW, non-Hispanic white; NHB, non-Hispanic black; MEX, Mexican American.
