# Supplementary material
Source: PubMed Central journal article supplement (PMC4088353)
Supplement: Supp_Table6-8.pdf [file Supp_Table6-8.pdf]

SUPPLEMENTARY TABLE S6. SENSITIVITY AND SPECIFICITY, AND RECLASSIFICATION ACCORDING TO DIFFERENT HbA1c CUTOFFS FOR PREDIABETES (IFG)

|             | HbA1c | Test characteristics |             |         |       |       | Reclassified (%) |         |
|-------------|-------|----------------------|-------------|---------|-------|-------|------------------|---------|
|             |       | Sensitivity          | Specificity | J value | PPV   | NPV   | IFG*             | No IFG† |
| All         | 5.4   | 0.694                | 0.543       | 0.238   | 0.560 | 0.680 | 13.2             | 23.5    |
|             | 5.5   | 0.597                | 0.643       | 0.240   | 0.583 | 0.656 | 17.4             | 18.4    |
|             | 5.6   | 0.486                | 0.744       | 0.231   | 0.614 | 0.634 | 22.1             | 13.2    |
|             | 5.7   | 0.383                | 0.834       | 0.217   | 0.659 | 0.618 | 26.6             | 8.5     |
|             | 5.8   | 0.278                | 0.891       | 0.169   | 0.680 | 0.596 | 31.1             | 5.6     |
| Male        | 5.4   | 0.663                | 0.535       | 0.198   | 0.635 | 0.566 | 8.6              | 9.7     |
|             | 5.5   | 0.567                | 0.632       | 0.199   | 0.652 | 0.545 | 11.0             | 7.7     |
|             | 5.6   | 0.455                | 0.743       | 0.198   | 0.683 | 0.528 | 13.9             | 5.4     |
|             | 5.7   | 0.350                | 0.837       | 0.186   | 0.723 | 0.514 | 16.6             | 3.4     |
|             | 5.8   | 0.243                | 0.891       | 0.133   | 0.730 | 0.491 | 19.3             | 2.3     |
| Female      | 5.4   | 0.740                | 0.548       | 0.289   | 0.486 | 0.786 | 4.6              | 13.8    |
|             | 5.5   | 0.640                | 0.650       | 0.291   | 0.513 | 0.758 | 6.3              | 10.7    |
|             | 5.6   | 0.531                | 0.745       | 0.276   | 0.546 | 0.734 | 8.3              | 7.8     |
|             | 5.7   | 0.432                | 0.832       | 0.264   | 0.597 | 0.718 | 10.0             | 5.1     |
|             | 5.8   | 0.329                | 0.890       | 0.219   | 0.634 | 0.697 | 11.8             | 3.4     |
| NHW         | 5.4   | 0.658                | 0.587       | 0.246   | 0.589 | 0.657 | 7.7              | 10.4    |
|             | 5.5   | 0.559                | 0.696       | 0.254   | 0.622 | 0.637 | 10.0             | 7.7     |
|             | 5.6   | 0.449                | 0.791       | 0.239   | 0.658 | 0.615 | 12.5             | 5.3     |
|             | 5.7   | 0.343                | 0.868       | 0.212   | 0.701 | 0.596 | 14.9             | 3.3     |
|             | 5.8   | 0.238                | 0.916       | 0.154   | 0.717 | 0.573 | 17.2             | 2.1     |
| NHB         | 5.4   | 0.791                | 0.423       | 0.214   | 0.462 | 0.763 | 1.3              | 5.8     |
|             | 5.5   | 0.718                | 0.500       | 0.218   | 0.474 | 0.738 | 1.8              | 5.0     |
|             | 5.6   | 0.638                | 0.605       | 0.243   | 0.503 | 0.727 | 2.3              | 4.0     |
|             | 5.7   | 0.541                | 0.718       | 0.259   | 0.546 | 0.714 | 2.9              | 2.8     |
|             | 5.8   | 0.424                | 0.801       | 0.224   | 0.571 | 0.689 | 3.6              | 2.0     |
| MEX         | 5.4   | 0.689                | 0.554       | 0.243   | 0.589 | 0.658 | 2.6              | 4.0     |
|             | 5.5   | 0.578                | 0.669       | 0.247   | 0.618 | 0.631 | 3.5              | 3.0     |
|             | 5.6   | 0.455                | 0.771       | 0.226   | 0.648 | 0.604 | 4.6              | 2.1     |
|             | 5.7   | 0.366                | 0.855       | 0.221   | 0.700 | 0.593 | 5.3              | 1.3     |
|             | 5.8   | 0.256                | 0.900       | 0.156   | 0.703 | 0.566 | 6.2              | 0.9     |
| 20–39 years | 5.4   | 0.504                | 0.701       | 0.206   | 0.432 | 0.759 | 5.3              | 7.0     |
|             | 5.5   | 0.414                | 0.790       | 0.204   | 0.470 | 0.749 | 6.2              | 4.9     |
|             | 5.6   | 0.309                | 0.867       | 0.176   | 0.512 | 0.736 | 7.3              | 3.1     |
|             | 5.7   | 0.208                | 0.921       | 0.128   | 0.541 | 0.721 | 8.4              | 1.9     |
|             | 5.8   | 0.141                | 0.958       | 0.099   | 0.600 | 0.712 | 9.1              | 1.0     |
| 40–59 years | 5.4   | 0.706                | 0.491       | 0.198   | 0.570 | 0.636 | 4.8              | 8.6     |
|             | 5.5   | 0.602                | 0.599       | 0.202   | 0.589 | 0.612 | 6.5              | 6.8     |
|             | 5.6   | 0.477                | 0.719       | 0.196   | 0.619 | 0.590 | 8.5              | 4.8     |
|             | 5.7   | 0.367                | 0.824       | 0.191   | 0.666 | 0.577 | 10.3             | 3.0     |
|             | 5.8   | 0.249                | 0.882       | 0.131   | 0.669 | 0.552 | 12.2             | 2.0     |
| 60–79 years | 5.4   | 0.807                | 0.283       | 0.090   | 0.626 | 0.497 | 3.1              | 7.8     |
|             | 5.5   | 0.711                | 0.393       | 0.104   | 0.635 | 0.478 | 4.7              | 6.6     |
|             | 5.6   | 0.612                | 0.519       | 0.131   | 0.654 | 0.474 | 6.3              | 5.3     |
|             | 5.7   | 0.515                | 0.663       | 0.178   | 0.694 | 0.479 | 7.9              | 3.7     |
|             | 5.8   | 0.396                | 0.759       | 0.155   | 0.710 | 0.459 | 9.8              | 2.6     |

\*False negative, people with prediabetes reclassified as not having prediabetes based on HbA1c cutoff.

†False positive, people not with prediabetes reclassified as having prediabetes based on HbA1c cutoff.

HbA1c, glycated hemoglobin; FPG, fasting plasma glucose; PPV, positive predict value; NPV, negative predict value; IFG, impaired fasting glucose,  $100 \leq$  fasting plasma glucose  $< 126$  mg/dL, and HbA1c  $< 6.5\%$ ; J value = Sensitivity + Specificity – 1; NHW, non-Hispanic white; NHB, non-Hispanic black; MEX, Mexican American.

SUPPLEMENTARY TABLE S7. SENSITIVITY AND SPECIFICITY, AND RECLASSIFICATION ACCORDING TO DIFFERENT HbA1c CUTOFFS FOR PREDIABETES (IGT)

|             | <i>HbA1c</i> | <i>Test characteristics</i> |                    |                |            |            | <i>Reclassified (%)</i> |                |
|-------------|--------------|-----------------------------|--------------------|----------------|------------|------------|-------------------------|----------------|
|             |              | <i>Sensitivity</i>          | <i>Specificity</i> | <i>J value</i> | <i>PPV</i> | <i>NPV</i> | <i>IGT*</i>             | <i>No IGT†</i> |
| All         | 5.4          | 0.653                       | 0.571              | 0.224          | 0.154      | 0.932      | 1.9                     | 19.5           |
|             | 5.5          | 0.544                       | 0.669              | 0.213          | 0.164      | 0.925      | 2.5                     | 15.1           |
|             | 5.6          | 0.449                       | 0.770              | 0.219          | 0.190      | 0.921      | 3.0                     | 10.5           |
|             | 5.7          | 0.316                       | 0.855              | 0.171          | 0.207      | 0.913      | 3.7                     | 6.6            |
|             | 5.8          | 0.214                       | 0.904              | 0.119          | 0.211      | 0.906      | 4.3                     | 4.4            |
| Male        | 5.4          | 0.683                       | 0.559              | 0.242          | 0.133      | 0.947      | 0.6                     | 8.3            |
|             | 5.5          | 0.554                       | 0.650              | 0.204          | 0.136      | 0.936      | 0.8                     | 6.6            |
|             | 5.6          | 0.455                       | 0.761              | 0.217          | 0.159      | 0.934      | 1.0                     | 4.5            |
|             | 5.7          | 0.327                       | 0.853              | 0.179          | 0.180      | 0.927      | 1.3                     | 2.8            |
|             | 5.8          | 0.228                       | 0.903              | 0.130          | 0.189      | 0.922      | 1.4                     | 1.8            |
| Female      | 5.4          | 0.637                       | 0.579              | 0.216          | 0.169      | 0.922      | 1.3                     | 11.2           |
|             | 5.5          | 0.539                       | 0.682              | 0.221          | 0.185      | 0.917      | 1.6                     | 8.5            |
|             | 5.6          | 0.446                       | 0.777              | 0.222          | 0.211      | 0.913      | 2.0                     | 6.0            |
|             | 5.7          | 0.311                       | 0.857              | 0.168          | 0.226      | 0.902      | 2.5                     | 3.8            |
|             | 5.8          | 0.207                       | 0.905              | 0.113          | 0.227      | 0.895      | 2.8                     | 2.5            |
| NHW         | 5.4          | 0.634                       | 0.619              | 0.253          | 0.165      | 0.935      | 1.0                     | 8.5            |
|             | 5.5          | 0.493                       | 0.725              | 0.218          | 0.175      | 0.924      | 1.3                     | 6.1            |
|             | 5.6          | 0.415                       | 0.822              | 0.237          | 0.216      | 0.922      | 1.5                     | 4.0            |
|             | 5.7          | 0.282                       | 0.893              | 0.174          | 0.237      | 0.913      | 1.9                     | 2.4            |
|             | 5.8          | 0.211                       | 0.933              | 0.144          | 0.270      | 0.909      | 2.1                     | 1.5            |
| NHB         | 5.4          | 0.771                       | 0.442              | 0.213          | 0.119      | 0.952      | 0.2                     | 5.1            |
|             | 5.5          | 0.667                       | 0.517              | 0.184          | 0.119      | 0.941      | 0.3                     | 4.4            |
|             | 5.6          | 0.521                       | 0.619              | 0.139          | 0.117      | 0.930      | 0.4                     | 3.5            |
|             | 5.7          | 0.438                       | 0.734              | 0.172          | 0.138      | 0.931      | 0.5                     | 2.4            |
|             | 5.8          | 0.292                       | 0.811              | 0.103          | 0.131      | 0.922      | 0.6                     | 1.7            |
| MEX         | 5.4          | 0.629                       | 0.586              | 0.215          | 0.183      | 0.915      | 0.4                     | 3.2            |
|             | 5.5          | 0.548                       | 0.700              | 0.248          | 0.213      | 0.913      | 0.5                     | 2.3            |
|             | 5.6          | 0.452                       | 0.802              | 0.254          | 0.252      | 0.908      | 0.6                     | 1.5            |
|             | 5.7          | 0.290                       | 0.876              | 0.167          | 0.257      | 0.893      | 0.8                     | 1.0            |
|             | 5.8          | 0.194                       | 0.914              | 0.108          | 0.250      | 0.885      | 0.9                     | 0.7            |
| 20–39 years | 5.4          | 0.408                       | 0.709              | 0.117          | 0.077      | 0.953      | 0.8                     | 6.5            |
|             | 5.5          | 0.352                       | 0.799              | 0.151          | 0.094      | 0.954      | 0.9                     | 4.5            |
|             | 5.6          | 0.254                       | 0.875              | 0.128          | 0.107      | 0.952      | 1.0                     | 2.8            |
|             | 5.7          | 0.183                       | 0.927              | 0.110          | 0.130      | 0.950      | 1.1                     | 1.6            |
|             | 5.8          | 0.099                       | 0.961              | 0.059          | 0.130      | 0.947      | 1.2                     | 0.9            |
| 40–59 years | 5.4          | 0.621                       | 0.507              | 0.128          | 0.129      | 0.919      | 0.7                     | 7.4            |
|             | 5.5          | 0.537                       | 0.618              | 0.155          | 0.141      | 0.919      | 0.8                     | 5.7            |
|             | 5.6          | 0.442                       | 0.739              | 0.181          | 0.165      | 0.919      | 1.0                     | 3.9            |
|             | 5.7          | 0.305                       | 0.840              | 0.145          | 0.182      | 0.912      | 1.2                     | 2.4            |
|             | 5.8          | 0.232                       | 0.894              | 0.126          | 0.204      | 0.909      | 1.4                     | 1.6            |
| 60–79 years | 5.4          | 0.813                       | 0.315              | 0.127          | 0.254      | 0.854      | 0.4                     | 5.7            |
|             | 5.5          | 0.656                       | 0.411              | 0.067          | 0.243      | 0.806      | 0.8                     | 4.9            |
|             | 5.6          | 0.563                       | 0.546              | 0.109          | 0.263      | 0.813      | 1.0                     | 3.7            |
|             | 5.7          | 0.398                       | 0.688              | 0.086          | 0.268      | 0.799      | 1.4                     | 2.6            |
|             | 5.8          | 0.266                       | 0.771              | 0.036          | 0.250      | 0.785      | 1.7                     | 1.9            |

\*False negative, people with prediabetes reclassified as not having prediabetes based on HbA1c cutoff.

†False positive, people not with prediabetes reclassified as having prediabetes based on HbA1c cutoff.

HbA1c, glycated hemoglobin; FPG, fasting plasma glucose; PPV, positive predict value; NPV, negative predict value; IGT, impaired glucose tolerance, 140 ≤ 2-hr glucose < 200 mg/day, fasting plasma glucose < 100 mg/dL, and HbA1c < 6.5%; J value = Sensitivity + Specificity - 1; NHW, non-Hispanic white; NHB, non-Hispanic black; MEX, Mexican American.

SUPPLEMENTARY TABLE S8. SENSITIVITY AND SPECIFICITY, AND RECLASSIFICATION ACCORDING TO DIFFERENT HbA1c CUTOFFS FOR PREDIABETES (IFG AND/OR IGT)

|             | HbA1c | Test characteristics |             |         |       |       | Reclassified (%) |             |
|-------------|-------|----------------------|-------------|---------|-------|-------|------------------|-------------|
|             |       | Sensitivity          | Specificity | J value | PPV   | NPV   | IFG/IGT*         | No IFG/IGT† |
| All         | 5.4   | 0.677                | 0.571       | 0.248   | 0.609 | 0.642 | 14.5             | 19.5        |
|             | 5.5   | 0.576                | 0.669       | 0.245   | 0.632 | 0.615 | 19.0             | 15.1        |
|             | 5.6   | 0.465                | 0.770       | 0.235   | 0.666 | 0.593 | 24.1             | 10.5        |
|             | 5.7   | 0.354                | 0.855       | 0.209   | 0.707 | 0.573 | 29.0             | 6.6         |
|             | 5.8   | 0.248                | 0.904       | 0.153   | 0.719 | 0.549 | 33.8             | 4.4         |
| Male        | 5.4   | 0.655                | 0.559       | 0.214   | 0.669 | 0.544 | 8.8              | 8.3         |
|             | 5.5   | 0.554                | 0.650       | 0.204   | 0.683 | 0.517 | 11.4             | 6.6         |
|             | 5.6   | 0.441                | 0.761       | 0.203   | 0.715 | 0.500 | 14.3             | 4.5         |
|             | 5.7   | 0.331                | 0.853       | 0.183   | 0.753 | 0.484 | 17.2             | 2.8         |
|             | 5.8   | 0.224                | 0.903       | 0.127   | 0.758 | 0.461 | 19.9             | 1.8         |
| Female      | 5.4   | 0.707                | 0.579       | 0.286   | 0.549 | 0.732 | 5.7              | 11.2        |
|             | 5.5   | 0.606                | 0.682       | 0.288   | 0.580 | 0.705 | 7.6              | 8.5         |
|             | 5.6   | 0.495                | 0.777       | 0.272   | 0.616 | 0.680 | 9.7              | 6.0         |
|             | 5.7   | 0.386                | 0.857       | 0.242   | 0.661 | 0.658 | 11.8             | 3.8         |
|             | 5.8   | 0.281                | 0.905       | 0.186   | 0.682 | 0.635 | 13.9             | 2.5         |
| NHW         | 5.4   | 0.642                | 0.619       | 0.261   | 0.637 | 0.624 | 8.3              | 8.5         |
|             | 5.5   | 0.534                | 0.725       | 0.259   | 0.669 | 0.600 | 10.8             | 6.1         |
|             | 5.6   | 0.424                | 0.822       | 0.246   | 0.712 | 0.578 | 13.3             | 4.0         |
|             | 5.7   | 0.312                | 0.893       | 0.204   | 0.751 | 0.555 | 15.9             | 2.4         |
|             | 5.8   | 0.212                | 0.933       | 0.144   | 0.765 | 0.532 | 18.2             | 1.5         |
| NHB         | 5.4   | 0.783                | 0.442       | 0.226   | 0.516 | 0.729 | 1.5              | 5.1         |
|             | 5.5   | 0.703                | 0.517       | 0.220   | 0.525 | 0.697 | 2.1              | 4.4         |
|             | 5.6   | 0.612                | 0.619       | 0.231   | 0.549 | 0.678 | 2.7              | 3.5         |
|             | 5.7   | 0.513                | 0.734       | 0.248   | 0.594 | 0.665 | 3.4              | 2.4         |
|             | 5.8   | 0.388                | 0.811       | 0.199   | 0.609 | 0.636 | 4.2              | 1.7         |
| MEX         | 5.4   | 0.665                | 0.586       | 0.250   | 0.646 | 0.606 | 3.0              | 3.2         |
|             | 5.5   | 0.558                | 0.700       | 0.258   | 0.679 | 0.582 | 3.9              | 2.3         |
|             | 5.6   | 0.438                | 0.802       | 0.241   | 0.716 | 0.557 | 5.0              | 1.5         |
|             | 5.7   | 0.338                | 0.876       | 0.214   | 0.756 | 0.538 | 5.9              | 1.0         |
|             | 5.8   | 0.226                | 0.914       | 0.141   | 0.750 | 0.510 | 6.8              | 0.7         |
| 20–39 years | 5.4   | 0.486                | 0.709       | 0.194   | 0.467 | 0.724 | 6.0              | 6.5         |
|             | 5.5   | 0.397                | 0.799       | 0.196   | 0.509 | 0.716 | 7.0              | 4.5         |
|             | 5.6   | 0.294                | 0.875       | 0.168   | 0.552 | 0.702 | 8.2              | 2.8         |
|             | 5.7   | 0.197                | 0.927       | 0.124   | 0.588 | 0.687 | 9.4              | 1.6         |
|             | 5.8   | 0.127                | 0.961       | 0.088   | 0.630 | 0.677 | 10.2             | 0.9         |
| 40–59 years | 5.4   | 0.687                | 0.507       | 0.194   | 0.614 | 0.586 | 5.4              | 7.4         |
|             | 5.5   | 0.585                | 0.618       | 0.203   | 0.636 | 0.566 | 7.1              | 5.7         |
|             | 5.6   | 0.463                | 0.739       | 0.202   | 0.669 | 0.547 | 9.2              | 3.9         |
|             | 5.7   | 0.348                | 0.840       | 0.187   | 0.712 | 0.530 | 11.2             | 2.4         |
|             | 5.8   | 0.238                | 0.894       | 0.132   | 0.719 | 0.507 | 13.1             | 1.6         |
| 60–79 years | 5.4   | 0.806                | 0.315       | 0.121   | 0.697 | 0.455 | 3.1              | 5.7         |
|             | 5.5   | 0.697                | 0.411       | 0.108   | 0.698 | 0.410 | 4.9              | 4.9         |
|             | 5.6   | 0.590                | 0.546       | 0.136   | 0.717 | 0.406 | 6.6              | 3.7         |
|             | 5.7   | 0.476                | 0.688       | 0.163   | 0.748 | 0.402 | 8.4              | 2.6         |
|             | 5.8   | 0.348                | 0.771       | 0.119   | 0.748 | 0.377 | 10.5             | 1.9         |

\*False negative, people with prediabetes reclassified as not having prediabetes based on HbA1c cutoff.

†False positive, people not with prediabetes reclassified as having prediabetes based on HbA1c cutoff.

HbA1c, glycated hemoglobin; FPG, fasting plasma glucose; PPV, positive predict value; NPV, negative predict value; IFG, impaired fasting glucose,  $100 \leq$  fasting plasma glucose  $< 126$  mg/dL, and HbA1c  $< 6.5\%$ ; IGT, impaired glucose tolerance,  $140 \leq 2$ -hr glucose  $< 200$  mg/dL, and HbA1c  $< 6.5\%$ ; J value = Sensitivity + Specificity - 1; NHW, non-Hispanic white; NHB, non-Hispanic black; MEX, Mexican American.
